# Supplementary material for: Estimating the burden of rheumatoid arthritis in Africa: A systematic analysis
Source: PubMed Central journal article supplement (PMC3529310; doi:10.7189/jogh.02.020406), 2012-12
Supplement: jogh-02-020406-s001.pdf [file jogh-02-020406-s001.pdf]

## **Online Supplementary Document**

Dowman et al. Estimating the burden of rheumatoid arthritis in Africa: A systematic analysis

Journal of Global Health 2012;2:020406

**Appendix 1:** Data extracted from population-based studies

**Appendix 2:** Data extracted from hospital-based studies

**Appendix 3:** Data distribution by age-groups before weighting

**Appendix 4:** Graphs presenting data distribution

**Appendix 5:** Estimates of prevalence with 95% confidence intervals

**Appendix 6:** Burden of disease for African population using UNPD demographic data

## Appendix 1: Data extracted from population-based studies

| Truswell AS, Hansen JDL. (1968) |          |             |        |            |
|---------------------------------|----------|-------------|--------|------------|
| Combined                        |          |             |        |            |
| age distribution                | mean age | cohort size | No. RA | prevalence |
| <20                             | 10       | 72          | 0      | 0          |
| 20-60                           | 40       | 68          | 0      | 0          |
| 60-72                           | 66       | 15          | 0      | 0          |
| total                           |          | 154         | 0      | 0          |

| Muller AS, Valkenburg HA, Greenwood BM. (1972) |          |             |        |            |
|------------------------------------------------|----------|-------------|--------|------------|
| Combined. ARA                                  |          |             |        |            |
| age distribution                               | mean age | cohort size | No. RA | prevalence |
| 25-34                                          | 29.5     | 173         | 1      | 0.58       |
| 35-44                                          | 39.5     | 176         | 5      | 2.84       |
| 45-54                                          | 49.5     | 134         | 1      | 0.75       |
| 55+                                            | 62       | 124         | 8      | 6.35       |
| total                                          |          | 607         | 15     | 2.47       |
| Male. ARA                                      |          |             |        |            |
| age distribution                               | mean age | cohort size | No. RA | prevalence |
| 25-34                                          | 29.5     | 81          | 0      | 0          |
| 35-44                                          | 39.5     | 86          | 3      | 3.5        |
| 45-54                                          | 49.5     | 64          | 1      | 1.6        |
| 55+                                            | 62       | 64          | 5      | 7.8        |
| total                                          |          | 295         | 9      | 3.1        |
| Female. ARA                                    |          |             |        |            |
| age distribution                               | mean age | cohort size | No. RA | prevalence |
| 25-34                                          | 29.5     | 92          | 1      | 1.1        |
| 35-44                                          | 39.5     | 90          | 2      | 2.2        |
| 45-54                                          | 49.5     | 70          | 0      | 0          |
| 55+                                            | 62       | 60          | 3      | 5          |
| total                                          |          | 312         | 6      | 1.9        |

| Beighton P, Solomon L, Vakenburg HA. (1975) |          |             |        |            |
|---------------------------------------------|----------|-------------|--------|------------|
| Combined. Rome                              |          |             |        |            |
| age distribution                            | mean age | cohort size | No. RA | prevalence |
| 15-24                                       | 19.5     | 380         | 0      | 0          |
| 25-34                                       | 29.5     | 50          | 0      | 0          |
| 35-44                                       | 39.5     | 51          | 0      | 0          |
| 45-54                                       | 49.5     | 66          | 1      | 1.51       |
| 55-64                                       | 59.5     | 105         | 2      | 1.9        |
| 65-74                                       | 69.5     | 85          | 1      | 1.18       |
| 75+                                         | 77.5     | 64          | 3      | 4.69       |
| total                                       |          | 801         | 7      | 0.87       |
| Male. Rome                                  |          |             |        |            |
| age distribution                            | mean age | cohort size | No. RA | prevalence |
| 15-24                                       | 19.5     | 182         | 0      | 0          |
| 25-34                                       | 29.5     | 17          | 0      | 0          |
| 35-44                                       | 39.5     | 18          | 0      | 0          |
| 45-54                                       | 49.5     | 20          | 1      | 5          |
| 55-64                                       | 59.5     | 31          | 2      | 6.5        |
| 65-74                                       | 69.5     | 24          | 1      | 4.2        |
| 75+                                         | 77.5     | 19          | 1      | 5.3        |
| total                                       |          | 311         | 5      | 1.6        |
| Female. Rome                                |          |             |        |            |
| age distribution                            | mean age | cohort size | No. RA | prevalence |
| 15-24                                       | 19.5     | 198         | 0      | 0          |
| 25-34                                       | 29.5     | 33          | 0      | 0          |
| 35-44                                       | 39.5     | 33          | 0      | 0          |
| 45-54                                       | 49.5     | 46          | 0      | 0          |
| 55-64                                       | 59.5     | 74          | 0      | 0          |
| 65-74                                       | 69.5     | 61          | 0      | 0          |
| 75+                                         | 77.5     | 45          | 2      | 4.4        |
| total                                       |          | 490         | 2      | 0.4        |

| Solomon L, Robin G, Valkenburg HA. (1975) |          |             |        |            |
|-------------------------------------------|----------|-------------|--------|------------|
| Combined. Rome                            |          |             |        |            |
| age distribution                          | mean age | cohort size | No. RA | prevalence |
| 15-24                                     | 19.5     | 179         | 0      | 0          |
| 25-34                                     | 29.5     | 99          | 0      | 0          |
| 35-44                                     | 39.5     | 65          | 2      | 3.08       |
| 45-54                                     | 49.5     | 52          | 2      | 3.85       |
| 55-64                                     | 59.5     | 67          | 4      | 6.25       |
| 65-74                                     | 69.5     | 64          | 8      | 12.5       |
| 75+                                       | 77.5     | 25          | 2      | 8          |
| total                                     |          | 551         | 18     | 3.3        |
| Male. Rome                                |          |             |        |            |
| age distribution                          | mean age | cohort size | No. RA | prevalence |
| 15-24                                     | 19.5     | 70          | 0      | 0          |
| 25-34                                     | 29.5     | 34          | 0      | 0          |
| 35-44                                     | 39.5     | 25          | 2      | 8          |
| 45-54                                     | 49.5     | 16          | 1      | 6.3        |
| 55-64                                     | 59.5     | 23          | 0      | 0          |
| 65-74                                     | 69.5     | 21          | 2      | 9.5        |
| 75+                                       | 77.5     | 8           | 0      | 0          |
| total                                     |          | 197         | 5      | 2.6        |
| Female. Rome                              |          |             |        |            |
| age distribution                          | mean age | cohort size | No. RA | prevalence |
| 15-24                                     | 19.5     | 109         | 0      | 0          |
| 25-34                                     | 29.5     | 65          | 0      | 0          |
| 35-44                                     | 39.5     | 40          | 0      | 0          |
| 45-54                                     | 49.5     | 36          | 1      | 2.8        |
| 55-64                                     | 59.5     | 44          | 4      | 9.1        |
| 65-74                                     | 69.5     | 43          | 6      | 14         |
| 75+                                       | 77.5     | 17          | 2      | 11.8       |
| total                                     |          | 354         | 13     | 3.7        |

| Meyers OL, Daynes G, Beighton P. (1977)  |          |             |        |            |
|------------------------------------------|----------|-------------|--------|------------|
| Combined. Rome w/ ARA exclusion criteria |          |             |        |            |
| age distribution                         | mean age | cohort size | No. RA | prevalence |
| 18+                                      | 36       | 433         | 10     | 2.3        |
| total                                    |          | 433         | 10     | 2.3        |

| Meyers OL, Jessop S, Klemp P. (1982) |          |             |        |            |
|--------------------------------------|----------|-------------|--------|------------|
| Combined. ARA                        |          |             |        |            |
| age distribution                     | mean age | cohort size | No. RA | prevalence |
| 65+                                  | 71.9     | 127         | 1      | 0.79       |
| total                                |          | 127         | 1      | 0.79       |

| Meyers OL, Jessop S, Klemp P. (1982) |          |             |        |            |
|--------------------------------------|----------|-------------|--------|------------|
| Combined. ARA                        |          |             |        |            |
| age distribution                     | mean age | cohort size | No. RA | prevalence |
| 65+                                  | 71.9     | 35          | 2      | 5.71       |
| total                                |          | 35          | 2      | 5.71       |



| Moolenburgh JD, Valkenburg HA, Fourie PB. (1986) |          |             |        |            |
|--------------------------------------------------|----------|-------------|--------|------------|
| Combined. ARA                                    |          |             |        |            |
| age distribution                                 | mean age | cohort size | No. RA | prevalence |
| 15-24                                            | 19.5     | 325         | 0      | 0          |
| 25-34                                            | 29.5     | 167         | 0      | 0          |
| 35-44                                            | 39.5     | 130         | 0      | 0          |
| 45-54                                            | 49.5     | 150         | 4      | 2.67       |
| 55-64                                            | 59.5     | 148         | 6      | 4.05       |
| 65-74                                            | 69.5     | 73          | 4      | 5.48       |
| 75+                                              | 82.1     | 60          | 2      | 8.33       |
| total                                            |          | 1070        | 16     | 1.8        |
| Male. ARA                                        |          |             |        |            |
| age distribution                                 | mean age | cohort size | No. RA | prevalence |
| 15-24                                            | 19.5     | 96          | 0      | 0          |
| 25-34                                            | 29.5     | 19          | 0      | 0          |
| 35-44                                            | 39.5     | 27          | 0      | 0          |
| 45-54                                            | 49.5     | 37          | 0      | 0          |
| 55-64                                            | 59.5     | 50          | 2      | 4          |
| 65-74                                            | 69.5     | 25          | 0      | 0          |
| 75+                                              | 82.6     | 23          | 0      | 0          |
| total                                            |          | 280         | 2      | 1.8        |
| Female. ARA                                      |          |             |        |            |
| age distribution                                 | mean age | cohort size | No. RA | prevalence |
| 15-24                                            | 19.5     | 229         | 0      | 0          |
| 25-34                                            | 29.5     | 150         | 0      | 0          |
| 35-44                                            | 39.5     | 103         | 0      | 0          |
| 45-54                                            | 49.5     | 113         | 4      | 3.5        |
| 55-64                                            | 59.5     | 98          | 4      | 4.1        |
| 65-74                                            | 69.5     | 58          | 4      | 6.9        |
| 75+                                              | 82.2     | 37          | 2      | 5.4        |
| total                                            |          | 790         | 14     | 1.8        |

| Brighton SW, de la Harpe AL, van Staden DJ,<br>Badenhorst JH, Myers OL. (1988) |             |                |           |            |
|--------------------------------------------------------------------------------|-------------|----------------|-----------|------------|
| Combined. Rome                                                                 |             |                |           |            |
| age<br>distribution                                                            | mean<br>age | cohort<br>size | No.<br>RA | prevalence |
| 18-30                                                                          | 24          | 151            | 0         | 0          |
| 31-40                                                                          | 35.5        | 203            | 0         | 0          |
| 41-50                                                                          | 45.5        | 129            | 0         | 0          |
| 51+                                                                            | 57.5        | 60             | 0         | 0          |
| total                                                                          |             | 543            | 0         | 0          |

| Silman AJ, Ollier W, Holligan S, Birrell F, Adebajo A, Asuzu MC, Thomson W, Peeper L. (1994) |          |             |        |            |
|----------------------------------------------------------------------------------------------|----------|-------------|--------|------------|
| Combined. ACR                                                                                |          |             |        |            |
| age distribution                                                                             | mean age | cohort size | No. RA | prevalence |
| 15-24                                                                                        | 19.5     | 574         | 0      | 0          |
| 25-34                                                                                        | 29.5     | 369         | 0      | 0          |
| 35-44                                                                                        | 39.5     | 293         | 0      | 0          |
| 45-54                                                                                        | 49.5     | 258         | 0      | 0          |
| 55-64                                                                                        | 59.5     | 134         | 0      | 0          |
| 65-74                                                                                        | 69.5     | 192         | 0      | 0          |
| 75+                                                                                          | 79.5     | 60          | 0      | 0          |
| total                                                                                        |          | 1994        | 0      | 0          |
| Male. ACR                                                                                    |          |             |        |            |
| age distribution                                                                             | mean age | cohort size | No. RA | prevalence |
| 15-24                                                                                        | 19.5     | 248         | 0      | 0          |
| 25-34                                                                                        | 29.5     | 139         | 0      | 0          |
| 35-44                                                                                        | 39.5     | 98          | 0      | 0          |
| 45-54                                                                                        | 49.5     | 92          | 0      | 0          |
| 55-64                                                                                        | 59.5     | 84          | 0      | 0          |
| 65-74                                                                                        | 69.5     | 70          | 0      | 0          |
| 75+                                                                                          | 79.1     | 23          | 0      | 0          |
| total                                                                                        |          | 757         | 0      | 0          |
| Female. ACR                                                                                  |          |             |        |            |
| age distribution                                                                             | mean age | cohort size | No. RA | prevalence |
| 15-24                                                                                        | 19.5     | 326         | 0      | 0          |
| 25-34                                                                                        | 29.5     | 230         | 0      | 0          |
| 35-44                                                                                        | 39.5     | 195         | 0      | 0          |
| 45-54                                                                                        | 49.5     | 166         | 0      | 0          |
| 55-64                                                                                        | 59.5     | 150         | 0      | 0          |
| 65-74                                                                                        | 69.5     | 122         | 0      | 0          |
| 75+                                                                                          | 79.7     | 37          | 0      | 0          |
| total                                                                                        |          | 1237        | 0      | 0          |

| Abdel-Nasser A, Abdel-Tawab R, Mahmoud J, Sammy A, Abdel-Fattah M. (2009) |          |             |        |            |
|---------------------------------------------------------------------------|----------|-------------|--------|------------|
| Combined. ACR                                                             |          |             |        |            |
| age distribution                                                          | mean age | cohort size | No. RA | prevalence |
| 15+                                                                       | 37       | 5120        | 18     | 0.35       |
| total                                                                     |          | 5120        | 18     | 0.35       |
| Male. ACR                                                                 |          |             |        |            |
| age distribution                                                          | mean age | cohort size | No. RA | prevalence |
| 15+                                                                       | 33.6     | 2558        | 3      | 0.12       |
| total                                                                     |          | 2558        | 3      | 0.12       |
| Female. ACR                                                               |          |             |        |            |
| age distribution                                                          | mean age | cohort size | No. RA | prevalence |
| 15+                                                                       | 39       | 2562        | 15     | 0.47       |
| total                                                                     |          | 2562        | 15     | 0.47       |

## Appendix 2: Data extracted from hospital-based studies

| Shaper AG, Shaper L (1958) - Urban |          |             |        |            |
|------------------------------------|----------|-------------|--------|------------|
| combined                           |          |             |        |            |
| age distribution                   | mean age | cohort size | No. RA | prevalence |
| 30-44                              | 37       | 2845        | 5      | 0.0018     |
| total                              |          | 2845        | 5      | 0.0018     |

| Greenwood BM (1968) - Urban |          |             |        |            |
|-----------------------------|----------|-------------|--------|------------|
| combined                    |          |             |        |            |
| age distribution            | mean age | cohort size | No. RA | prevalence |
| 15-44                       | 29.5     | 41798       | 32     | 0.08       |
| 45-64                       | 54.5     | 11421       | 10     | 0.09       |
| total                       |          | 98454*      | 42     | 0.04       |

---

\* Total population includes age groups outside age distribution. Not broken down in separate age groups in study

| Greenwood BM (1969) - Urban |          |             |        |            |
|-----------------------------|----------|-------------|--------|------------|
| combined                    |          |             |        |            |
| age distribution            | mean age | cohort size | No. RA | prevalence |
|                             | 34.2     | 67377       | 35     | 0.05       |
| total                       |          | 67377       | 35     | 0.05       |

| Anderson IF (1970) - Urban |          |             |        |            |
|----------------------------|----------|-------------|--------|------------|
| combined                   |          |             |        |            |
| age distribution           | mean age | cohort size | No. RA | prevalence |
| 21-30                      | 25.5     | 10503       | 6      | 0.06       |
| 31-40                      | 35.5     | 7827        | 7      | 0.09       |
| 41-50                      | 45.5     | 5753        | 3      | 0.05       |
| 51-60                      | 55.5     | 4014        | 3      | 0.07       |
| 61+                        | 68.9     | 3680        | 4      | 0.11       |
| total                      |          | 66900*      | 23     | 0.03       |

---

\* Total population includes age groups outside age distribution. Not broken down in separate age groups in study



| Edginton ME, Hodkinson J, Seftel HC (1972) - Rural |          |             |        |            |
|----------------------------------------------------|----------|-------------|--------|------------|
| combined                                           |          |             |        |            |
| age distribution                                   | mean age | cohort size | No. RA | prevalence |
| 10-20                                              | 15.00    | 81          | 0      | 0          |
| 21-30                                              | 25.50    | 124         | 1      | 0.81       |
| 31-40                                              | 35.5     | 129         | 0      | 0          |
| 41-50                                              | 45.5     | 102         | 2      | 1.96       |
| 51-60                                              | 55.5     | 54          | 0      | 0          |
| 61+                                                | 68.9     | 43          | 0      | 0          |
| total                                              |          | 533         | 3      | 0.56       |

| Tsega E, Choremi H, Bottazzo GF, Doniach D (1980) - Urban |          |             |        |            |
|-----------------------------------------------------------|----------|-------------|--------|------------|
| combined                                                  |          |             |        |            |
| age distribution                                          | mean age | cohort size | No. RA | prevalence |
| †                                                         | 21.9     | 7966        | 19     | 0.24       |
| total                                                     |          | 7966        | 19     | 0.24       |

---

† Age groups not given. Estimation of mean age from UNPD data

| Moolenburgh JD, Moore S, Valkenburg HA, Rasmus MG. (1984) - Rural |          |             |        |            |
|-------------------------------------------------------------------|----------|-------------|--------|------------|
| combined                                                          |          |             |        |            |
| age distribution                                                  | mean age | cohort size | No. RA | prevalence |
| 15-24                                                             | 19.5     | 5046        | 2      | 0.04       |
| 25-34                                                             | 29.5     | 4698        | 8      | 0.17       |
| 35-44                                                             | 39.5     | 2262        | 5      | 0.22       |
| 45-54                                                             | 49.5     | 1566        | 8      | 0.51       |
| 55-64                                                             | 59.5     | 1218        | 5      | 0.41       |
| 65+                                                               | 72.8     | 1044        | 4      | 0.38       |
| total                                                             |          | 15834       | 32     | 0.2        |

| Brighton SW, de la Harpe AL, van Staden DJ,<br>Badenhorst JH, Myers OL (1988) - Rural |             |                |           |            |
|---------------------------------------------------------------------------------------|-------------|----------------|-----------|------------|
| combined                                                                              |             |                |           |            |
| age<br>distribution                                                                   | mean<br>age | cohort<br>size | No.<br>RA | Prevalence |
| *                                                                                     | 22.3        | 255740         | 14        | 0.0055     |
| total                                                                                 |             | 255740         | 14        | 0.0055     |

---

\* Age groups not given. Estimation of mean age from UNPD data

| Bwanahali K, Mbuyi M, Kapita B (1991) - Urban |          |             |        |            |
|-----------------------------------------------|----------|-------------|--------|------------|
| combined                                      |          |             |        |            |
| age distribution                              | mean age | cohort size | No. RA | Prevalence |
| 11-20                                         | 15.5     | 420         | 1      | 0.24       |
| 21-30                                         | 25.5     | 791         | 4      | 0.51       |
| 31-40                                         | 35.5     | 664         | 4      | 0.6        |
| 41-50                                         | 45.5     | 459         | 1      | 0.22       |
| 51-60                                         | 55.5     | 230         | 1      | 0.43       |
| 61-70                                         | 65.5     | 107         | 0      | 0          |
| 71+                                           | 75.6     | 30          | 0      | 0          |
| total                                         |          | 2701        | 11     | 0.41       |
| male                                          |          |             |        |            |
| age distribution                              | mean age | cohort size | No. RA | Prevalence |
| 11-20                                         | 15.50    | 152         | 0      | 0          |
| 21-30                                         | 25.5     | 419         | 1      | 0.2        |
| 31-40                                         | 35.5     | 305         | 2      | 0.66       |
| 41-50                                         | 45.5     | 221         | 0      | 0          |
| 51-60                                         | 55.50    | 133         | 0      | 0          |
| 61-70                                         | 65.5     | 52          | 0      | 0          |
| 71+                                           | 72.5     | 13          | 0      | 0          |
| total                                         |          | 1295        | 3      | 0.23       |
| female                                        |          |             |        |            |
| age distribution                              | mean age | cohort size | No. RA | Prevalence |
| 11-20                                         | 15.5     | 268         | 1      | 0.37       |
| 21-30                                         | 25.5     | 372         | 3      | 0.81       |
| 31-40                                         | 35.5     | 359         | 2      | 0.84       |
| 41-50                                         | 45.5     | 238         | 1      | 1.03       |
| 51-60                                         | 55.5     | 97          | 1      | 1.82       |
| 61-70                                         | 65.5     | 55          | 0      | 0          |
| 71+                                           | 75.7     | 17          | 0      | 0          |
| total                                         |          | 1406        | 8      | 0.57       |

| Bileckot R, Malonga AC (1998) - Urban |          |             |        |            |
|---------------------------------------|----------|-------------|--------|------------|
| combined                              |          |             |        |            |
| age distribution                      | mean age | cohort size | No. RA | Prevalence |
| 23-65                                 | 43.5     | 3518        | 36     | 1.02       |
| total                                 |          | 3518        | 36     | 1.02       |

| Malemba JJ, Mbuyi-Muamba JM (2007) - Urban |          |             |        |            |
|--------------------------------------------|----------|-------------|--------|------------|
| combined                                   |          |             |        |            |
| age distribution                           | mean age | cohort size | No. RA | Prevalence |
| *                                          | 45.3     | 19587       | 82     | 0.49       |
| total                                      |          | 19587       | 82     | 0.49       |
| male                                       |          |             |        |            |
| age distribution                           | mean age | cohort size | No. RA | Prevalence |
| *                                          | 44.3     | 9753        | 22     | 0.23       |
| total                                      |          | 9753        | 22     | 0.23       |
| FEMALE                                     |          |             |        |            |
| age distribution                           | mean age | cohort size | No. RA | Prevalence |
| *                                          | 46.5     | 9852        | 60     | 0.61       |
| total                                      |          | 9852        | 60     | 0.61       |

---

\* Age groups not given. Estimation of mean age from UNPD data

### Appendix 3: Data distribution by age -groups before weighting

Population studies: both sexes

| AGE         | Prevalence  | Cohort size |
|-------------|-------------|-------------|
| 10          | 0           | 72          |
| <b>19.5</b> | <b>0</b>    | <b>380*</b> |
| <b>19.5</b> | <b>0</b>    | <b>179</b>  |
| <b>19.5</b> | <b>0</b>    | <b>325</b>  |
| <b>19.5</b> | <b>0</b>    | <b>574</b>  |
| <b>24</b>   | <b>0</b>    | <b>151</b>  |
| 29.5        | 0           | 167         |
| 29.5        | 0           | 99          |
| 29.5        | 0           | 50          |
| 29.5        | 0.58        | 173         |
| 29.5        | 0           | 369         |
| <b>35.5</b> | <b>0</b>    | <b>203</b>  |
| <b>36</b>   | <b>2.3</b>  | <b>433</b>  |
| <b>37</b>   | <b>0.35</b> | <b>5120</b> |
| <b>39.5</b> | <b>2.84</b> | <b>176</b>  |
| <b>39.5</b> | <b>0</b>    | <b>51</b>   |
| <b>39.5</b> | <b>3.08</b> | <b>65</b>   |
| <b>39.5</b> | <b>0</b>    | <b>130</b>  |
| <b>39.5</b> | <b>0</b>    | <b>293</b>  |
| <b>40</b>   | <b>0</b>    | <b>68</b>   |
| 45.5        | 0           | 129         |
| 49.5        | 0.75        | 134         |
| 49.5        | 1.51        | 66          |
| 49.5        | 3.85        | 52          |
| 49.5        | 2.67        | 150         |
| 49.5        | 0           | 258         |
| <b>57.5</b> | <b>0</b>    | <b>60</b>   |
| <b>59.5</b> | <b>4.05</b> | <b>148</b>  |
| <b>59.5</b> | <b>6.25</b> | <b>67</b>   |
| <b>59.5</b> | <b>1.9</b>  | <b>105</b>  |
| <b>59.5</b> | <b>0</b>    | <b>134</b>  |
| <b>62</b>   | <b>6.35</b> | <b>126</b>  |
| 66          | 0           | 15          |
| 69.5        | 1.18        | 85          |
| 69.5        | 12.5        | 64          |
| 69.5        | 5.48        | 73          |
| 69.5        | 0           | 192         |
| 71.9        | 0.79        | 127         |



|             |             |           |
|-------------|-------------|-----------|
| 71.9        | 5.71        | 35        |
| <b>77.5</b> | <b>8</b>    | <b>25</b> |
| <b>77.5</b> | <b>4.69</b> | <b>64</b> |
| <b>79.5</b> | <b>0</b>    | <b>60</b> |
| <b>82.1</b> | <b>8.33</b> | <b>60</b> |

Population studies: females only

| AGE         | Prevalence  | Cohort size |
|-------------|-------------|-------------|
| 19.5        | 0           | 182         |
| 19.5        | 0           | 70          |
| 19.5        | 0           | 96          |
| 19.5        | 0           | 248         |
| <b>29.5</b> | <b>0</b>    | <b>139</b>  |
| <b>29.5</b> | <b>0</b>    | <b>19</b>   |
| <b>29.5</b> | <b>0</b>    | <b>34</b>   |
| <b>29.5</b> | <b>0</b>    | <b>17</b>   |
| <b>29.5</b> | <b>0</b>    | <b>81</b>   |
| <b>33.6</b> | <b>0.12</b> | <b>2558</b> |
| 39.5        | 0           | 27          |
| 39.5        | 3.5         | 86          |
| 39.5        | 0           | 18          |
| 39.5        | 8           | 25          |
| 39.5        | 0           | 98          |
| <b>49.5</b> | <b>0</b>    | <b>92</b>   |
| <b>49.5</b> | <b>6.3</b>  | <b>16</b>   |
| <b>49.5</b> | <b>5</b>    | <b>20</b>   |
| <b>49.5</b> | <b>1.6</b>  | <b>64</b>   |
| <b>49.5</b> | <b>0</b>    | <b>37</b>   |
| 59.5        | 4           | 50          |
| 59.5        | 6.5         | 31          |
| 59.5        | 0           | 23          |
| 59.5        | 0           | 84          |
| 62          | 7.8         | 64          |
| <b>69.5</b> | <b>4.2</b>  | <b>24</b>   |
| <b>69.5</b> | <b>9.5</b>  | <b>21</b>   |
| <b>69.5</b> | <b>0</b>    | <b>25</b>   |
| <b>69.5</b> | <b>0</b>    | <b>70</b>   |
| 77.5        | 0           | 8           |
| 77.5        | 5.3         | 19          |
| 79.1        | 0           | 23          |
| 82.6        | 13          | 23          |

Population studies: males only

| AGE         | Prevalence | Cohort size |
|-------------|------------|-------------|
| 19.5        | 0          | 198         |
| 19.5        | 0          | 109         |
| 19.5        | 0          | 229         |
| 19.5        | 0          | 326         |
| <b>29.5</b> | <b>0</b>   | <b>230</b>  |
| <b>29.5</b> | <b>0</b>   | <b>150</b>  |
| <b>29.5</b> | <b>0</b>   | <b>65</b>   |
| <b>29.5</b> | <b>0</b>   | <b>33</b>   |
| <b>29.5</b> | <b>1.1</b> | <b>92</b>   |
| 39          | 0.47       | 2562        |
| 39.5        | 2.2        | 90          |
| 39.5        | 0          | 33          |
| 39.5        | 0          | 40          |
| 39.5        | 0          | 103         |
| 39.5        | 0          | 195         |
| <b>49.5</b> | <b>0</b>   | <b>166</b>  |
| <b>49.5</b> | <b>3.5</b> | <b>113</b>  |
| <b>49.5</b> | <b>2.8</b> | <b>36</b>   |
| <b>49.5</b> | <b>0</b>   | <b>46</b>   |
| <b>49.5</b> | <b>0</b>   | <b>70</b>   |
| 59.5        | 0          | 74          |
| 59.5        | 9.1        | 44          |
| 59.5        | 4.1        | 98          |
| 59.5        | 0          | 150         |
| 62          | 5          | 60          |
| <b>69.5</b> | <b>0</b>   | <b>122</b>  |
| <b>69.5</b> | <b>0</b>   | <b>61</b>   |
| <b>69.5</b> | <b>14</b>  | <b>43</b>   |
| <b>69.5</b> | <b>6.9</b> | <b>58</b>   |
| 77.5        | 11.8       | 17          |
| 77.5        | 4.4        | 45          |
| 79.7        | 0          | 37          |
| 82.2        | 5.4        | 37          |

### Hospital studies: both sexes

| AGE         | Prevalence   | Cohort size  |
|-------------|--------------|--------------|
| 15.5        | 0.24         | 420          |
| 19.5        | 0            | 179          |
| <b>21.9</b> | <b>0.24</b>  | <b>7966</b>  |
| <b>25.5</b> | <b>0.06</b>  | <b>10503</b> |
| <b>25.5</b> | <b>0.51</b>  | <b>791</b>   |
| <b>29.5</b> | <b>0</b>     | <b>99</b>    |
| <b>29.5</b> | <b>0.08%</b> | <b>41798</b> |
| 34.2        | 0.05         | 67377        |
| 35.5        | 0.6          | 664          |
| 35.5        | 0.09         | 7827         |
| 37          | 0.0018       | 2845         |
| 39.5        | 3.08         | 65           |
| <b>43.5</b> | <b>1.02</b>  | <b>3518</b>  |
| <b>45.3</b> | <b>0.49</b>  | <b>19587</b> |
| <b>45.5</b> | <b>0.05</b>  | <b>5753</b>  |
| <b>45.5</b> | <b>0.22</b>  | <b>459</b>   |
| <b>49.5</b> | <b>3.85</b>  | <b>52</b>    |
| 54.5        | 0.09         | 11421        |
| 55.5        | 0.43         | 230          |
| 55.5        | 0.07         | 4014         |
| 59.5        | 6.25         | 67           |
| <b>65.5</b> | <b>0</b>     | <b>107</b>   |
| <b>68.9</b> | <b>0.11</b>  | <b>3680</b>  |
| <b>69.5</b> | <b>12.5</b>  | <b>64</b>    |
| 71.9        | 5.71         | 35           |
| 75.6        | 0            | 30           |
| 77.5        | 8            | 25           |

# Appendix 4: Graphs presenting data distribution

## Population studies:

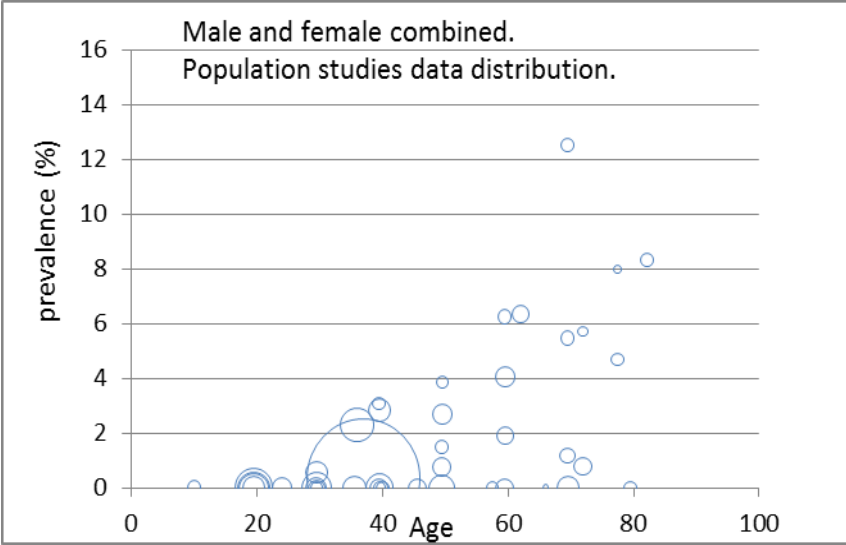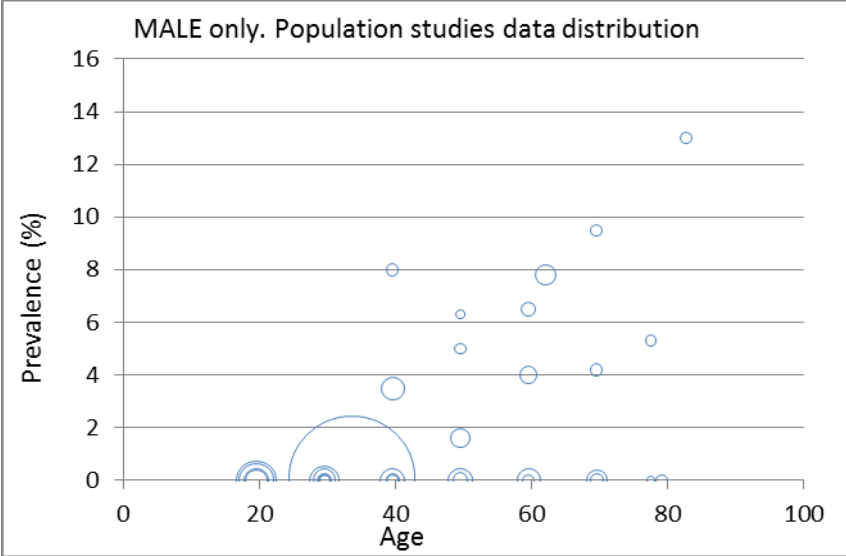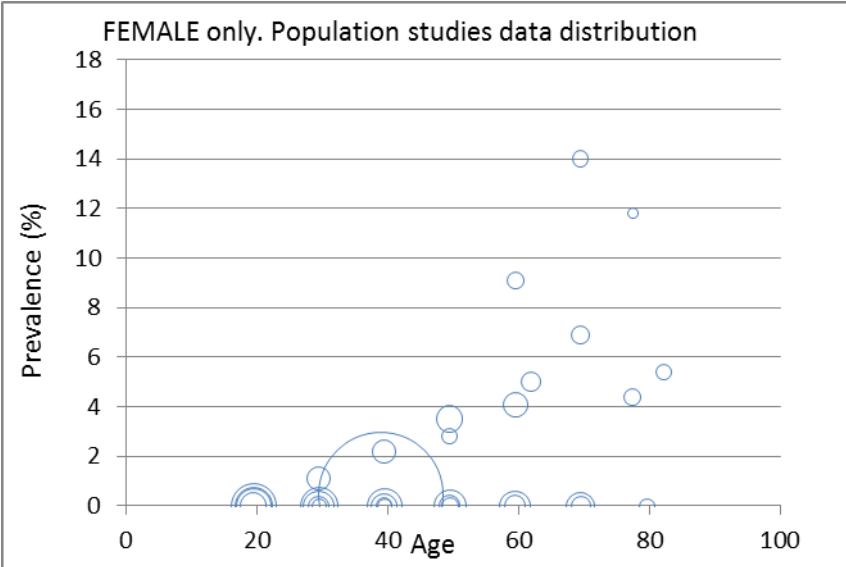

**Hospital studies:**

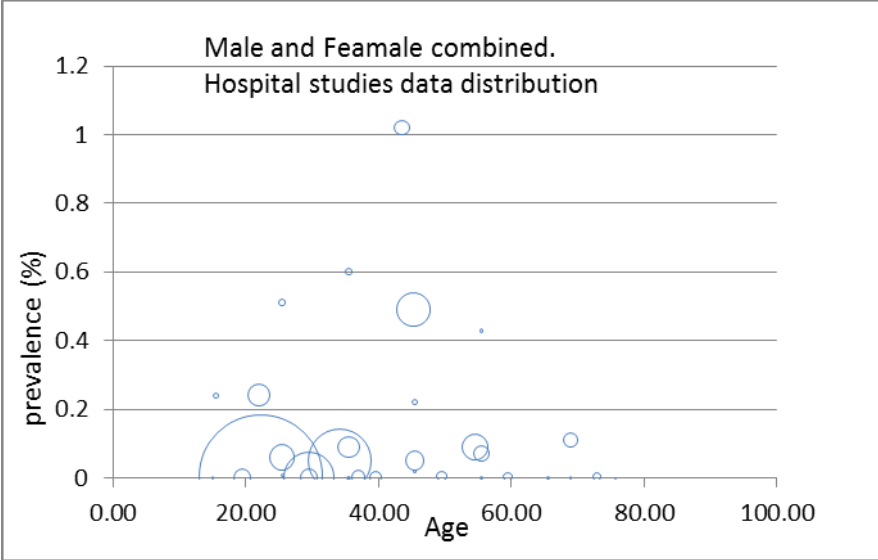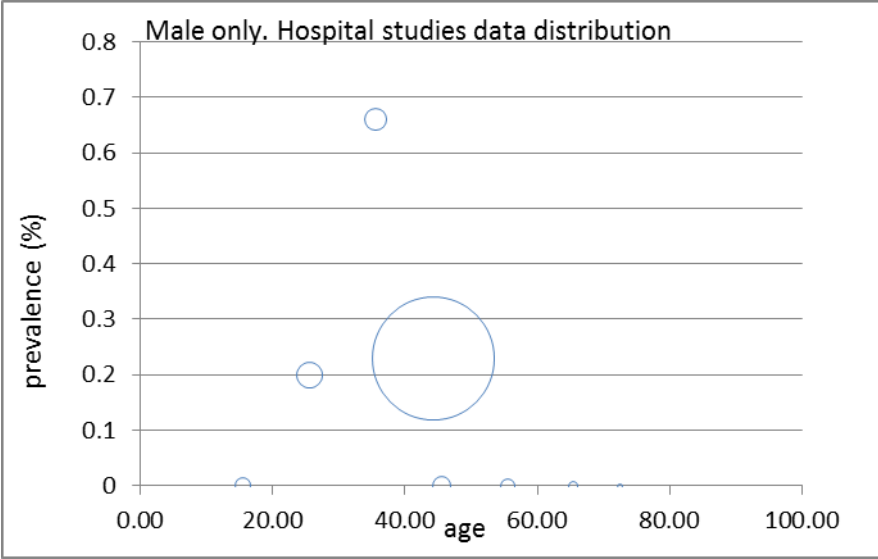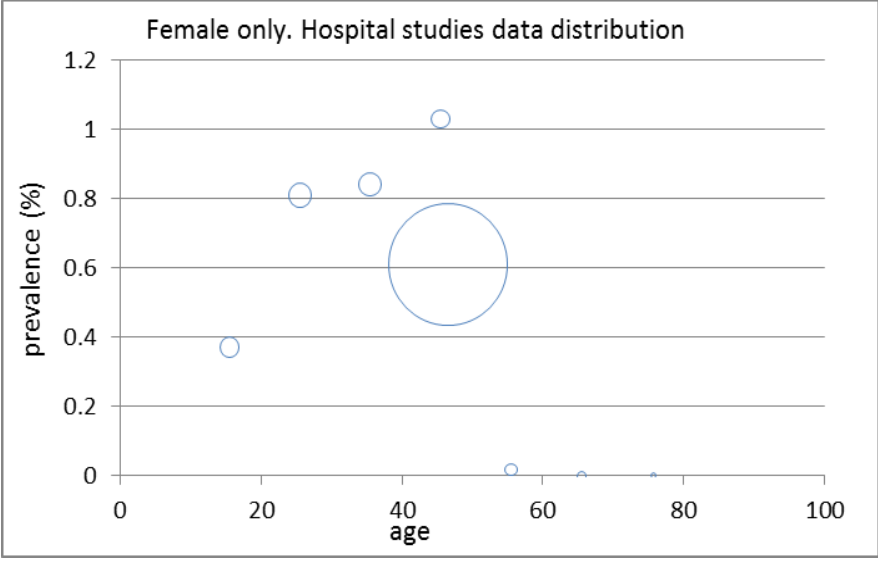

## Appendix 5: Estimates of prevalence with 95% confidence intervals\*

### Population-based studies: both sexes

| Age (years) | Prevalence (%) | cohort size | Confidence intervals 95% |       |
|-------------|----------------|-------------|--------------------------|-------|
| 0-15        | 0              | 72          | 0                        | 0     |
| 15-25       | 0              | 1609        | 0                        | 0     |
| 25-35       | 0.117          | 858         | 0                        | 0.305 |
| 35-45       | 0.533          | 6539        | 0.418                    | 0.648 |
| 45-55       | 1.015          | 789         | 0.340                    | 1.690 |
| 55-65       | 3.152          | 640         | 1.837                    | 4.467 |
| 65-75       | 2.708          | 591         | 1.434                    | 3.982 |
| 75+         | 4.784          | 209         | 1.917                    | 7.651 |

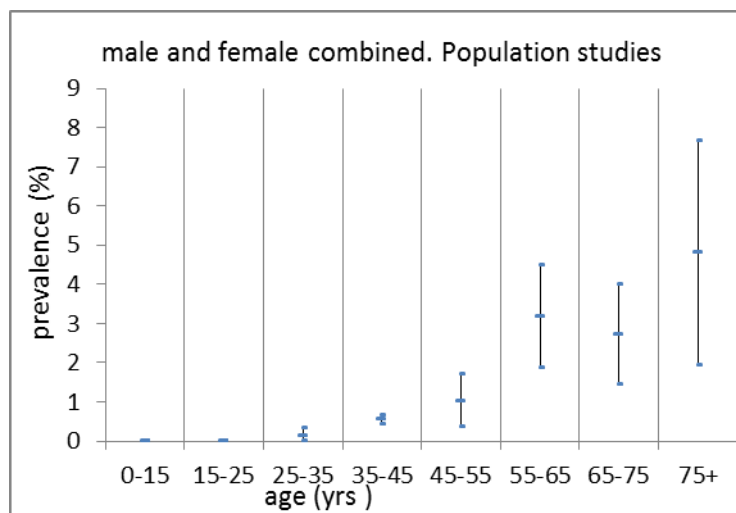

Population-based studies: males only

| Age (years) | Prevalence (%) | cohort size | Confidence intervals 95% |       |
|-------------|----------------|-------------|--------------------------|-------|
|             |                |             |                          |       |
| 15-25       | 0              | 596         | 0                        | 0     |
| 25-35       | 0.11           | 2848        | 0.04                     | 0.18  |
| 35-45       | 1.97           | 254         | 0.31                     | 3.63  |
| 45-55       | 1.32           | 229         | 0                        | 2.76  |
| 55-65       | 3.57           | 252         | 1.35                     | 5.79  |
| 65-75       | 2.15           | 140         | 0                        | 4.51  |
| 75+         | 5.48           | 73          | 0.30                     | 10.66 |

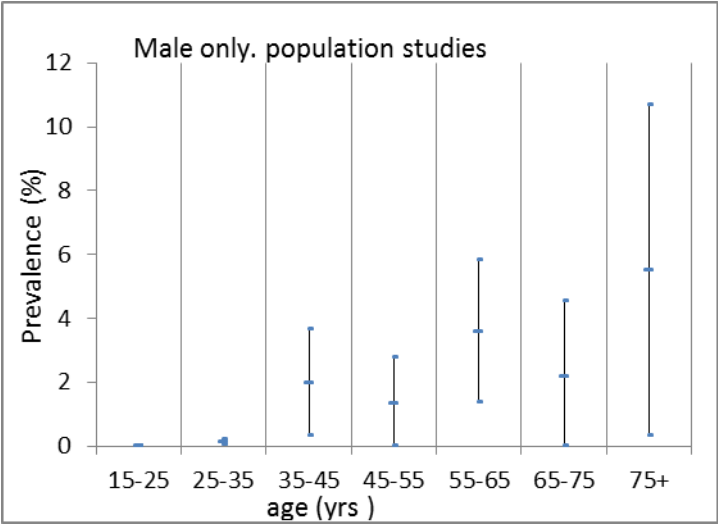

| Age (years) | Prevalence (%) | cohort size | Confidence intervals 95% |      |
|-------------|----------------|-------------|--------------------------|------|
|             |                |             |                          |      |
| 15-25       | 0              | 862         | 0                        | 0    |
| 25-35       | 0.18           | 570         | 0                        | 0.51 |
| 35-45       | 0.46           | 3023        | 0.35                     | 0.63 |
| 45-55       | 1.15           | 431         | 0.18                     | 2.12 |
| 55-65       | 2.59           | 426         | 1.14                     | 4.04 |
| 65-75       | 4.04           | 284         | 1.81                     | 6.27 |
| 75+         | 4.4            | 136         | 0.99                     | 7.81 |

Population-based studies: females only

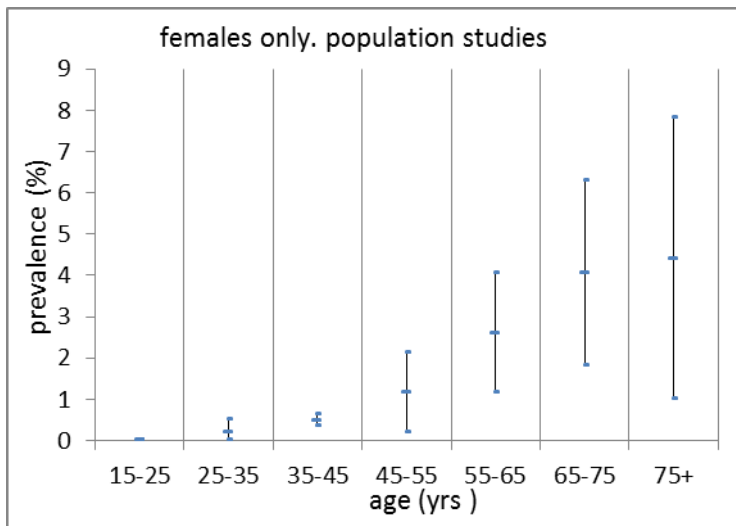



### Hospital-based studies: both sexes

| Age (years) | Prevalence (%) | cohort size | Confidence intervals 95% |      |
|-------------|----------------|-------------|--------------------------|------|
| 15-25       | 0              | 862         | 0                        | 0    |
| 25-35       | 0.18           | 570         | 0                        | 0.51 |
| 35-45       | 0.46           | 3023        | 0.35                     | 0.63 |
| 45-55       | 1.15           | 431         | 0.18                     | 2.12 |
| 55-65       | 2.59           | 426         | 1.14                     | 4.04 |
| 65-75       | 4.04           | 284         | 1.81                     | 6.27 |
| 75+         | 4.4            | 136         | 0.99                     | 7.81 |

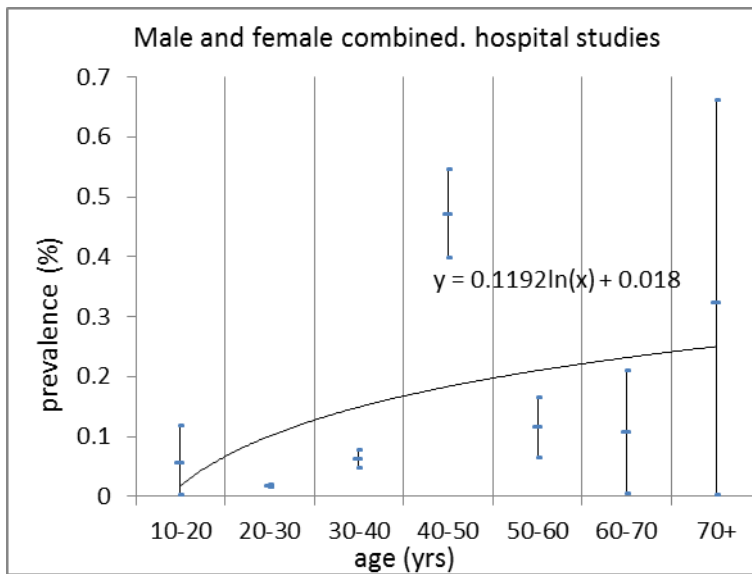

## Appendix 6: Burden of disease for African population using UNPD demographic data

### Burden of RA in the year 1990 - both sexes

| age   | burden of diseases | population of age group UNPD 1990 |
|-------|--------------------|-----------------------------------|
| 0-14  | 0                  | 282,352,000                       |
| 15-24 | 0                  | 122,399,000                       |
| 25-34 | 99,892             | 85,378,000                        |
| 35-44 | 312,155            | 58,603,000                        |
| 45-54 | 404,853            | 39,887,000                        |
| 55-64 | 847,320            | 26,882,000                        |
| 65-74 | 389,518            | 14,384,000                        |
| 75+   | 258,383            | 5,401,000                         |
| total | 2,311,124          | 635,287,000                       |

### Burden of RA in the year 2010 - both sexes

| Age (years) | Burden of disease to the nearest 1000 | Prevalence (%) | Population by UNPD 2010 |
|-------------|---------------------------------------|----------------|-------------------------|
| 0-14        | 0                                     | 0              | 411,728,000             |
| 15-24       | 0                                     | 0              | 205,355,000             |
| 25-34       | 179,000                               | 0.117          | 153,166,000             |
| 35-44       | 537,000                               | 0.533          | 100,750,000             |
| 45-54       | 705,000                               | 1.015          | 69,492,000              |
| 55-64       | 1,443,000                             | 3.152          | 45,793,000              |
| 65-74       | 683,000                               | 2.708          | 25,213,000              |
| 75+         | 725,000                               | 4.784          | 15,162,000              |
| total       | 4,272,000                             | 0.416          | 1,026,639,000           |
